# Supplementary material
Source: publisher figshare collection journal article supplement (https://gsapubs.figshare.com/ndownloader/files/31150849)
Supplement: Supplementary file 1 [file 31150849]

## Sheet: LP-01
359.2	5.31
361.1	7.02
361.6	5.9
365.5	5.98
365.8	5.67
366.9	5.74
370	7.31
370.1	6.9
372.9	6.89
374.9	6.03
375.8	6
377	6.22
378.8	5.61
379.2	6.83
382.4	5.96
382.7	6.22
382.8	6.36
383.4	7.31
384.5	7.54
387	6.24
388.2	6.25
390	6.88
390.2	6.59
390.4	6.1
390.9	6.8
391.1	6.17
392.1	6.31
392.2	7.36
393.5	6.13
394.6	6.63
395.1	6.05
395.7	6.47
397.3	6.09
400.8	7.16
402.3	9.01
402.7	12.8
409.3	6.9
420.5	26.89
438	9.99
463.4	7.1
479.8	8.85
500.3	19.53
724.6	11.03
827.5	11.92
836.7	11.75
903.4	13.03
924	13.61
939.4	13.49
989.1	14.48
992.4	14.73
1027.9	61.93
1106.8	65.36
1118.7	61.08
1547.6	59.19
1698.5	56.19
2264.9	58.79
2356.9	55.44
2380.1	56.81
2399.9	51.79
2404.9	55
2463.5	121.32
2464.8	52.89
2594.2	50.72
2737.4	60.22
3084.8	49.2

## Sheet: LP-02
357.6	10.17
364.3	8.17
368.1	8.31
377.7	8.68
398.1	9.28
410.2	9.17
419.1	9.39
427.4	9.51
427.9	9.46
428.8	9.64
428.9	9.59
429.7	9.65
434.4	9.66
435.3	9.99
440.5	9.76
440.9	9.85
442	10
443.7	9.87
445.3	9.87
448.7	10.02
457.3	10.46
464.5	10.31
467.4	10.49
650.1	14.14
848	18.29
890.6	19.21
898.2	19.29
905.1	19.49
906.2	19.6
922.2	19.87
935.4	19.97
940.8	20.15
947.2	20.49
950.3	20.24
974.7	20.83
992.7	21.09
1048.2	61.3
1239.7	62.46
1457.1	60.14
1736.7	57.35
1808.8	54.65
1835.7	56.15
1889.3	53.03
1893.3	56.83
1894.5	53
1901.4	53.79
1907.6	53.94
1931.5	53.85
1950.3	52.3
1979.1	55.91
2030.1	57.03
2035.8	53.91
2036.1	53.95
2044.7	54.51
2051.8	54.1
2054	55.2
2061.7	55.64
2090.5	54.24
2152.2	55.38
2219	56.49
2261.1	51.41
2277.8	50.31
2310.1	50.79
2313.9	51.24
2327.6	53.35
2360.7	52.29
2361	52.25
2455.8	50.83
2460	50.76
2474	51.53
2475.8	50.44

## Sheet: LP-03
335.6	5.46
338.9	5.28
354.2	5.17
373.1	5.65
415.7	6.07
431.8	6.55
453.2	6.74
1774	56.83
1821.7	55.32
1842	59.43
1857.9	56.25
1862.7	55.46
1875.4	55.29
1898.9	55.05
1901.2	54.82
1912.4	55.27
1916.7	55.04
1924.9	55.69
1927.4	72.46
1929.7	54.72
1947.6	54.43
1955.8	55.01
1965.3	55.01
1973.5	54.54
1991.9	54.61
2007.5	60.11
2010.9	69.92
2017.2	54.35
2041.4	54.07
2108	54.21
2114.9	54.38
2121.1	53.47
2132.3	53.68
2133.3	53.07
2137	53.5
2141.2	53.77
2194.6	54.66
2195.7	53.66
2196.8	53.22
2206.5	52.89
2215.3	53.23
2225.5	54.52
2245.2	52.63
2248.8	53.5
2270.8	53
2296.9	52.49
2298.7	52.3
2305.6	56.52
2315.7	52.47
2316.1	52.54
2321.4	52.74
2324.4	52.17
2326.5	52.37
2341	52.59
2341.2	52.5
2348.6	61.82
2357.8	51.94
2359.5	52.1
2360.8	51.89
2380.2	52.83
2380.6	52.53
2411	51.79
2421.6	51.46
2445.7	51.99
2467	51.21
2488.3	51.57

## Sheet: LP-04
329.4	5.46
341.5	5.54
419.4	23.64
419.6	5.82
421.8	21.46
430.1	6
438.8	6.52
440.8	6.97
441.8	6.27
443.6	6.73
457	23.17
735.7	10.53
922.6	11.94
947.4	45.89
1697.2	143.2
1707.9	63.56
1710.7	87.9
1762.5	60.78
1763.3	58.11
1768.3	60.6
1779.2	119.25
1804	66.4
1829.8	64.04
1836.1	66.57
1842.2	79.89
1846.9	57.15
1849.2	56.52
1852.1	56
1854.2	56.41
1856.3	58.67
1857.7	56.71
1861.7	55.47
1873.8	66.46
1881.5	63.04
1886.1	58.97
1897	57.7
1905.3	55.5
1909.2	70.97
1912.6	66.88
1912.6	61.64
1925.2	58.8
1931.6	60.99
1936.4	64.75
1937.1	58.1
1938.4	58.69
1940.3	56.26
1949.2	59.7
1959.3	69.12
1960.6	56.84
1960.8	55.98
1961.5	58.55
1974.4	55.07
1976.8	57.11
1981.2	54.59
1989.4	73.67
1989.4	57.45
1992.3	60.46
1992.8	63.15
1998.9	54.47
2005.6	71.75
2006.5	55.78
2023.7	53.67
2027	55.61
2028.4	54.16
2032.6	55.81
2042.5	64.77
2042.6	57.09
2068.8	60.73
2082.3	58.53
2091.8	65.41
2114.5	59.51
2125.6	76.9
2139.6	53.58
2173.7	64.28
2195.5	62.93
2217.8	57.63
2219.3	92.01
2235.5	55.99
2242.1	52.13
2243.8	64.49
2245.2	58.35
2247.2	64.37
2255.9	53.65
2257.9	54.94
2271.4	54.63
2273.2	65.07
2278.5	54.93
2284.9	70.68
2285.5	60.62
2291	93.49
2294.4	60.38
2296.3	71.99
2297.2	55.84
2308	52.49
2327.2	62.13
2328.9	53.44
2332.1	51.55
2333.2	57.76
2361.3	55.34
2366.8	56.55
2369.6	56.47
2373.4	54.43
2374.5	53.25
2375.5	54.94
2395.1	54.73
2403.3	57.43
2416.8	52.96
2438	56.19
2439.7	55.66
2440	55.86
2460.5	56.86
2466.4	53.91
2469.2	53.02
2476.7	54.83
2483.6	53.47
2489.3	54.61
2489.3	52.2
2493.6	53.08
2524.7	53.9
2554.2	74.16
2556.5	51.97
2600.2	53.74
3263.8	46.36

## Sheet: LP-05
267.4	6.14
273.8	6.42
276.1	11.49
280.9	8.61
282.5	5.35
284.3	4.98
287.8	4.83
289	7.7
289.1	5.57
289.2	5.2
290.5	4.88
290.8	8.7
292.5	5.3
294.3	7.84
294.4	6.46
295.2	4.96
295.4	9.8
295.8	6.49
296.4	4.96
296.7	5.5
296.7	6.15
296.9	4.98
297	6.06
297.8	11.59
298.1	4.95
298.7	4.98
298.8	5.81
299.4	5.25
299.7	8.66
299.9	6.04
300.5	6.44
300.8	6.51
300.9	4.92
301.2	5.07
301.9	5.08
302	5.07
302.1	5.08
302.2	11.02
302.3	5.04
302.6	5.02
302.7	5.49
303.3	5.08
304.8	13.46
305.5	5.11
305.5	15.88
306.1	5.08
306.1	5.09
306.5	5.13
306.6	5.12
306.7	5.41
307.8	5.09
308.9	6.36
309.2	5.12
309.4	8.07
310.6	8.59
311.1	8.27
312.2	8.13
312.2	6.26
312.6	5.23
313	5.14
314.6	5.96
314.6	5.85
314.7	8.11
315	7.39
315.3	5.38
315.3	5.28
315.4	12.26
315.8	8.3
316.3	5.28
317.5	5.55
318.2	5.31
319.5	5.33
319.9	5.42
319.9	8.42
321.3	5.4
322.4	5.36
323.4	5.43
323.9	7.82
324.2	5.39
326.9	11.32
327.7	7.14
331.3	7.24
332.2	5.53
334.8	5.92
337.5	6.02
366.5	15.04
371.4	6.51
383.6	6.37
389.2	12.5
389.7	7.9
423.1	6.88
423.5	14.99
425.2	7.05
425.2	6.54
426.8	6.97
427.4	7.04
428	6.99
430.6	7.68
431	7.08
432.2	7.22
434.6	7.17
434.6	8.04
436.3	7.18
438.8	7.19
439.8	7.22
442.2	7.25
443.4	7.27
443.7	16.05
445.2	7.31
448.2	7.14
448.4	7.37
451.9	8.7
452.1	7.49
452.1	8.36
453.7	9.86
453.9	7.47
454.3	7.5
455.2	7.44
458.9	7.62
461.4	7.59
461.7	7.57
465.6	7.73
489.8	9.95
491.2	8.03
533.9	8.67
1022.6	60.65
1052.2	65.81
1199.5	62.58
1396.8	13.51
1518.9	62.62
1769.2	57.48
1784.2	56.93
1796.9	55.28
2299.9	50.34
2410.4	51.9
2438.2	52.62
2494.9	49.93
2512.2	51.53
2819.4	48.66

## Sheet: LP-06
352.702	4.99442
356.288	3.45762
369.406	4.24038
382.294	4.03747
386.079	4.03933
409.036	3.94557
411.215	4.06941
411.751	3.73679
412.368	4.76947
412.646	4.18412
419.626	4.90316
419.643	5.90347
425.261	3.91683
425.438	3.87792
431.372	4.96908
432.794	4.07153
433.605	4.20854
433.671	5.09272
436.532	5.14618
439.762	5.02582
443.493	4.22725
444.823	4.22238
454.451	4.42651
454.614	4.79918
460.042	5.10243
463.272	6.25138
463.91	5.07141
468.146	6.17991
472.302	4.66583
474.998	5.3162
475.382	5.24164
476.367	4.89618
478.245	7.6848
478.647	4.32834
481.872	7.2043
482.508	5.96656
483.546	5.71002
505.443	5.95572
519.636	4.38084
609.139	8.245
649.247	8.84348
668.752	8.29557
800.164	8.47478
818.2	7.11771
821.215	7.92975
827.833	8.52633
856.115	9.12857
898.822	9.69682
949.161	7.0114
951.072	7.66522
955.723	11.6498
965.017	8.10802
1012.96	38.89
1144.45	38.4275
1077.47	56.0225
1109.26	78.7025
1261.11	25
1398.15	38.585
1803.39	36.425
1710.8	43.83
1679.63	43.365
1646.6	55.555
1742.59	39.505
2662.66	27.62
2391.66	29.63
2492.28	31.33
2566.35	-0.77
2983.34	31.02
3136.11	31.4825

## Sheet: LP-07
379.243	3.85798
398.442	4.56599
411.16	4.37249
411.312	3.97132
414.895	4.29957
423.115	4.96084
424.619	4.78714
429.103	4.92953
431.784	4.46957
432.292	4.82811
441.501	4.44344
448.316	4.68616
450.581	4.54424
452.465	4.41913
455.496	5.15304
458.716	3.61584
461.215	3.78488
468.462	5.56011
518.659	5.25027
738.284	7.11017
790.377	8.51508
792.408	7.5334
794.826	7.25617
811.271	8.70004
815.636	7.8155
820.956	7.66684
849.577	7.60742
910.37	9.07422
927.394	8.63221
930.565	8.24076
933.755	7.42722
935.358	8.62709
937.078	8.5326
938.455	7.08934
940.591	8.16885
948.48	11.907
978.435	8.29546
1009.26	55.56
983.335	63.8925
1053.71	44.445
1105.56	45.5275
1420.37	75.9275
1188.89	52.31
1209.26	43.515
1433.34	50
1565.13	37.495
1594.44	30.7075
1657.4	48.1475
1649.99	50.3075
1794.44	39.665
1872.53	34.105
2036.72	31.6325
2202.78	33.3375
2212.96	27.315
2327.78	35.495
2354.64	36.265
2310.18	30.56
2358.95	35.03
2375.93	35.9525
2399.07	27.775
2410.18	29.32
2450.3	35.185
2427.78	30.705
2464.81	31.485
2529.32	34.105
2542.28	27.47
2708.34	38.2725
2714.51	35.65
2754.02	33.64
2799.07	29.6275
3109.26	27.47
3238.89	35.4925

## Sheet: LP-08
293.096	4.27242
299.049	3.78605
300.263	4.33365
300.667	4.17882
300.797	4.99714
302.082	4.0918
302.414	4.21071
302.682	5.12952
303.682	4.40785
305.182	5.23205
305.428	4.14318
307.111	6.24265
309.022	5.93534
310.347	3.67763
310.922	5.58534
311.292	3.47678
311.979	5.22638
311.989	5.18364
314.294	5.96933
314.437	5.85673
314.839	4.50648
315.22	3.69113
316.505	5.14047
318.106	4.66833
319.877	3.87149
319.894	4.54482
321.43	5.18358
327.596	5.93285
329.371	4.35182
332.718	5.72315
344.007	7.70484
350.298	4.25128
373.298	4.72074
413.003	5.77671
419.466	5.6064
432.208	6.16259
432.606	5.29421
437.314	6.94423
438.353	6.22289
439.708	7.4061
440.908	5.34717
441.157	5.96445
442.2	5.57291
442.652	5.73863
443.662	6.17868
448.224	4.94244
449.861	4.5269
449.986	5.8351
452.338	6.785
453.723	4.74723
458.505	9.21328
471.454	5.42119
472.521	10.6003
474.025	4.90003
475.937	9.64137
479.17	7.08302
1009.26	67.1325
1005.56	92.75
1198.15	56.475
1364.81	64.35
1633.33	58.95
1699.08	55.0925
1905.56	43.055
1876.24	40.89
1783.34	105.715
2323.77	40.7425
2425.61	40.12
2404.63	60.6425
2553.39	42.9025

## Sheet: Maoniushan Devonian
371	13
392	4
392	7
398	9
399	10
400	8
403	3
404	6
408	7
408	7
411	6
411	6
415	3
415	3
415	8
415	11
415	4
416	2
416	9
416	4
416	3
416	5
417	7
417	9
417	3
417	7
418	4
418	6
419	3
421	3
421	3
422	14
422	5
423	7
423	14
423	5
423	2
423	11
423	4
423	3
423	7
424	7
424	7
424	3
424	4
424	4
424	13
424	13
424	2
424	39
424	3
424	6
424	5
424	2
424	3
424	7
424	7
424	7
425	7
425	3
425	6
425	3
425	4
425	4
425	4
425	3
425	5
425	7
425	7
426	6
426	5
426	22
426	6
426	7
426	5
426	14
427	7
427	9
427	1
429	7
429	7
429	7
429	7
430	7
430	7
430	4
430	7
431	7
432	7
432	7
432	2
432	7
433	7
433	7
433	2
433	1
433	7
433	7
434	19
435	5
435	3
435	9
436	17
436	6
437	7
437	7
437	7
437	2
437	3
437	7
437	7
437	7
438	14
440	5
442	7
442	7
442	7
442	7
443	7
443	7
445	7
445	7
445	7
446	7
446	3
446	3
446	7
447	7
447	7
447	7
447	6
447	16
447	7
447	7
448	11
450	7
450	7
450	7
450	7
451	7
451	26
451	7
452	18
453	11
453	7
454	8
454	8
455	2
456	7
456	7
457	7
457	7
458	7
458	7
461	23
462	7
462	3
462	3
462	7
463	3
463	3
464	3
464	3
464	3
464	6
465	18
467	7
470	18
479	3
483	32
487	8
487	8
494	37
499	8
499	8
510	2
522	3
534	5
547	12
556	6
562	9
562	9
571	6
584	28
591	3
598	6
599	9
599	9
601	9
601	9
615	9
615	9
617	2
623	4
626	7
633	4
636	4
644	13
671	5
688	7
721	11
721	11
740	11
740	11
746	12
746	12
749	5
756	5
772	3
784	3
785	8
799	12
799	12
807	12
807	12
812	5
827	5
832	6
832	7
844	5
846	11
847	9
849	6
850	4
851	5
856	4
861	13
861	13
862	4
862	9
865	4
871	6
872	13
872	13
874	8
875	8
876	5
878	4
879	5
880	18
882	78
883	6
883	134
884	6
885	21
885	5
885	7
886	6
889	4
889	8
893	6
895	5
896	7
898	5
899	6
900	5
901	4
906	15
907	14
907	14
910	14
910	14
911	6
912	7
919	3
921	10
922	14
922	5
922	5
922	8
922	5
922	5
922	14
923	6
923	6
923	7
923	5
923	5
923	5
923	5
923	5
923	5
923	5
924	5
924	5
924	5
924	5
924	5
924	5
924	5
924	5
924	5
924	5
925	4
926	5
926	6
927	5
928	14
928	14
929	2
931	14
932	6
934	9
935	5
936	5
937	9
940	6
947	16
952	2
954	3
960	5
964	4
976	15
976	13
976	15
981	15
981	15
989	15
989	15
991	8
992	15
992	15
993	15
993	15
1011	15
1017	63
1017	63
1023	8
1052	25
1052	30
1060	25
1072	6
1097	49
1107	12
1122	12
1130	59
1130	57
1133	6
1145	4
1145	37
1167	7
1195	12
1200	8
1213	59
1213	8
1213	59
1225	9
1255	59
1255	59
1257	6
1288	6
1326	61
1326	61
1339	67
1339	67
1362	34
1382	44
1413	25
1433	25
1436	40
1469	8
1474	46
1500	8
1504	5
1511	46
1536	57
1536	57
1545	25
1582	54
1582	54
1587	7
1595	59
1595	59
1611	56
1611	56
1612	9
1615	58
1615	58
1627	10
1628	53
1628	53
1631	58
1631	58
1639	8
1658	29
1668	25
1679	31
1687	55
1687	55
1722	7
1723	28
1728	33
1731	55
1731	55
1747	53
1747	53
1766	26
1768	23
1786	32
1791	27
1792	8
1815	5
1817	5
1821	53
1821	53
1841	4
1856	7
1889	54
1889	54
1901	36
2027	52
2027	52
2206	8
2389	14
2410	7
2417	48
2417	48
2427	19
2432	49
2432	49
2450	1
2456	48
2456	48
2457	6
2458	53
2458	53
2464	10
2465	10
2472	48
2472	7
2477	5
2477	5
2477	6
2479	8
2483	5
2484	50
2484	48
2484	50
2484	48
2487	19
2488	48
2488	48
2491	54
2491	54
2498	5
2500	9
2500	22
2513	6
2525	4
2529	17
2531	52
2531	52
2535	5
2539	49
2539	49
2547	5
2549	50
2550	7
2550	50
2593	6
2665	5
2675	19
2677	48
2725	49
2725	49
2727	5
2828	47
2828	47
2978	47
2978	47
3030	23
3107	9
3115	10
3226	11
3259	48
3260	48
3282	46
3282	46

## Sheet: 2010XTS-05
431	7
431	6
430	7
432	7
429	7
431	9
431	8
432	8
431	9
430	9
431	7
431	8
431	8
430	10
431	12
431	7
430	8
431	7
431	8
429	9
431	7
432	8
431	6
431	8
429	8
432	11
432	9
431	11
430	10
431	8
431	10
432	11
456	17
456	6
456	7
456	10
457	7
456	9
456	10
457	15
457	10
456	12
456	7
456	8
533	9
745	18
857	16
898	22
902	17
903	17
904	14
937	9
1568	89
1604	61
1748	98
1734	43
1780	98
1812	44
1820	91
1803	40
1928	48
2592	34

[truncated: 8 more sheets: AM01,02, BLG1510, KDLG1510, BLG0622, Gj0208, Ec0608, 11HL-56, 11HL-51,55,57]
